# Supplementary material for: Multiple Membrane Interactions and Versatile Vesicle Deformations Elicited by Melittin
Source: Toxins (Basel). 2013 Apr 17;5(4):637–64. doi: 10.3390/toxins5040637 (PMC3705284; doi:10.3390/toxins5040637)
Supplement: Supplementary File 1 — Supplementary Materials (ZIP, 2599 KB) [file toxins-05-00637-s001.zip]

Archive with 2 entries (2 files):
- PhasedShrinkage_50%PG-Liposomes.mov
- CaptionOfSupplementaryMovie.pdf
